# Supplementary material
Source: publisher figshare collection journal article supplement (https://acs.figshare.com/ndownloader/files/4555063)
Supplement: Supplementary file 1 [file 4555063]

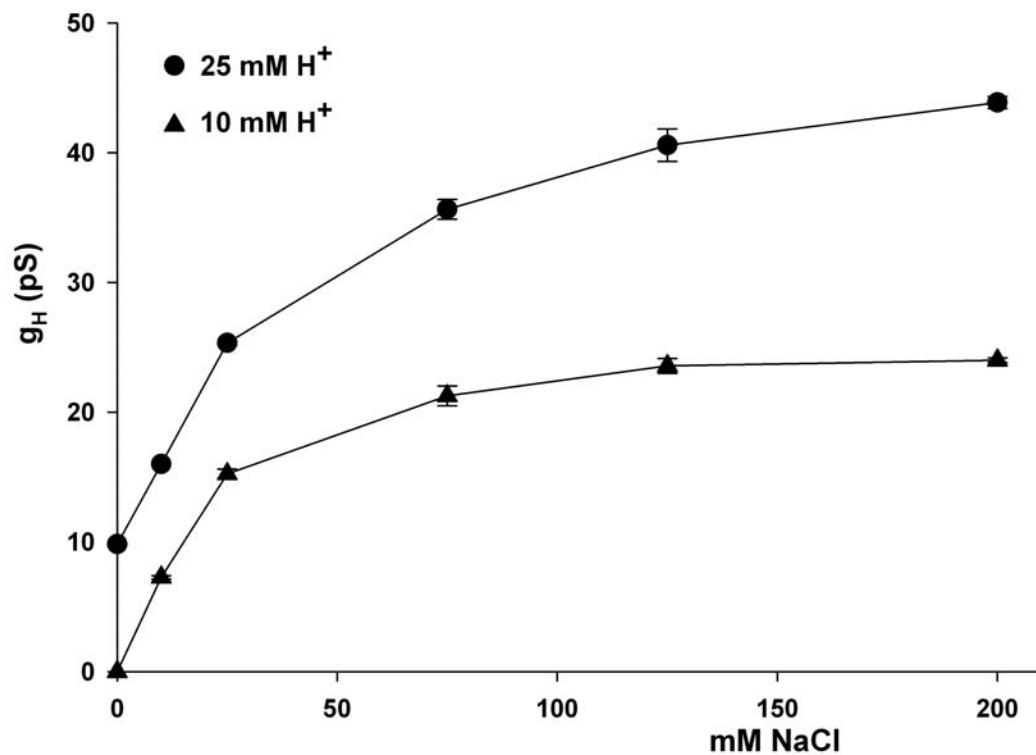

In this figure,  $g_H$  values in the SS-dioxolane linked gA channel in two distinct  $[H^+]$  (10 and 25 mM) reconstituted in plain ceramide membranes are plotted against various  $[NaCl]$  added to bulk solutions. At those  $[H^+]$ ,  $g_H$  is virtually 0 (at 10 mM  $[H^+]$ ) or heavily attenuated at 10 pS (25 mM  $[H^+]$ , see figure 2 in the manuscript). Increasing the solution ionic strength by adding NaCl enhanced  $g_H$  significantly and continuously. The lack of discontinuity in this plot suggests that there are no abrupt phase changes in the lipid bilayer.
